# Supplementary material for: Das AKTIN-Notaufnahmeregister – kontinuierlich aktuelle Daten aus der Akutmedizin
Source: Springer Nature journal article supplement (doi:10.1007/s00063-020-00764-2), 2020-12-21
Supplement: MOESM1 [file 18703432]

## Zusatzmaterial

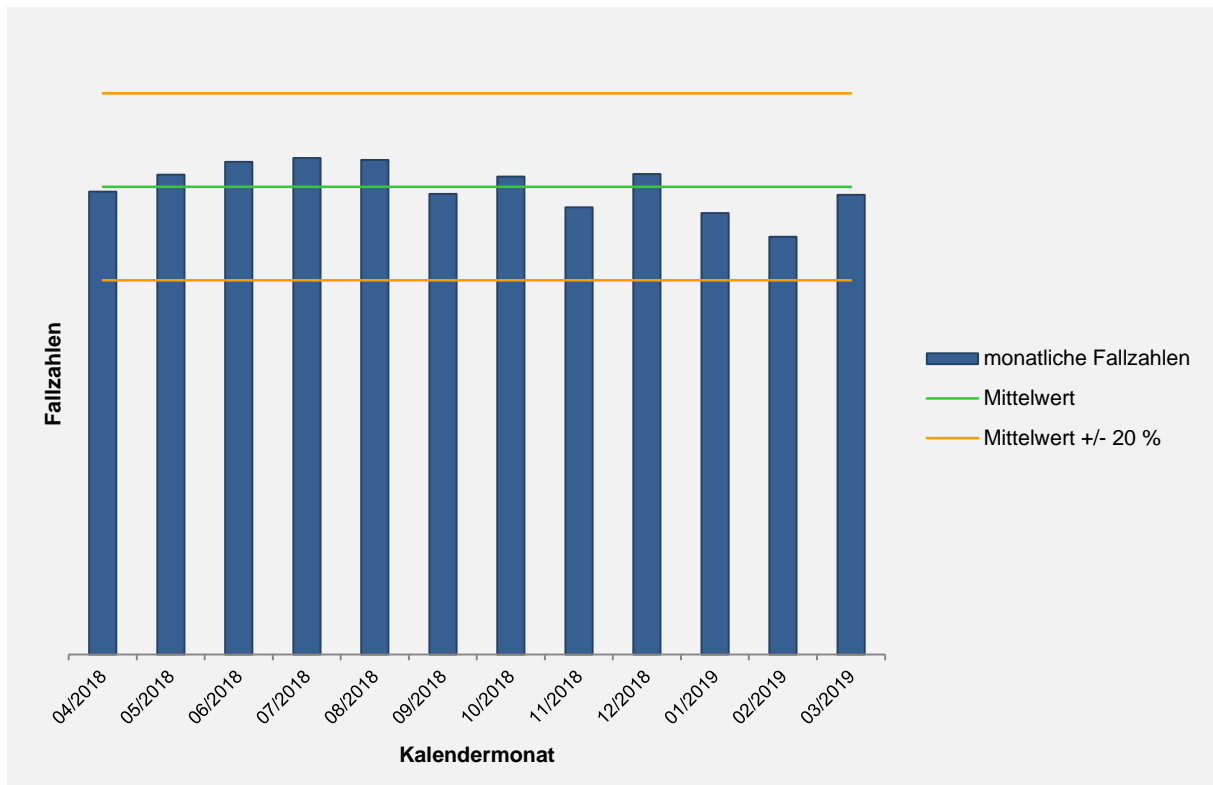

Abb. S1: Exemplarische Notaufnahme mit stabilen Fallzahlen im Zeitverlauf

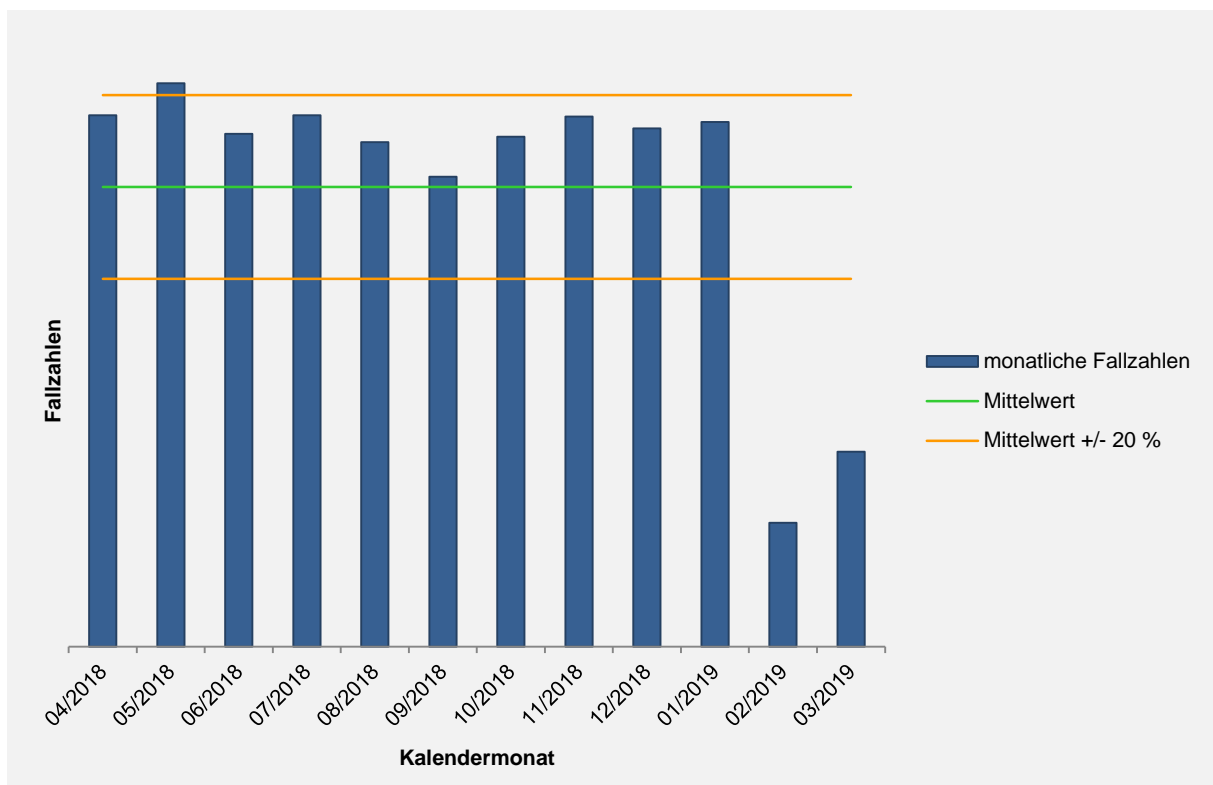

Abb. S2: Exemplarische Notaufnahme mit nicht plausiblen Fallzahlschwankungen im Zeitverlauf
